# Supplementary material for: Trypanosoma brucei triggers a broad immune response in the adipose tissue
Source: PubMed Central journal article supplement (PMC8476018; doi:10.1371/journal.ppat.1009933), 2021-09-15

A

| Day post-infection | Organ Weight (mg) |     |     |    |     |    |            |     |     |     |     |     |
|--------------------|-------------------|-----|-----|----|-----|----|------------|-----|-----|-----|-----|-----|
|                    | Spleen            |     |     |    |     |    | gonadal AT |     |     |     |     |     |
| 0                  | 76                | 72  | 98  | 68 | 110 | 82 | 423        | 338 | 374 | 549 | 376 | 398 |
| 4                  | 72                | 68  |     |    |     |    | 398        | 265 |     |     |     |     |
| 5                  | 215               | 173 | 144 |    |     |    | 460        | 499 | 383 |     |     |     |
| 6                  | 233               | 177 |     |    |     |    | 288        | 410 |     |     |     |     |
| 7                  | 266               | 271 |     |    |     |    | 403        | 332 |     |     |     |     |
| 9                  | 323               | 196 |     |    |     |    | 418        | 361 |     |     |     |     |
| 14                 | 398               | 186 | 384 |    |     |    | 116        | 104 | 97  |     |     |     |
| 15                 | 375               | 399 | 406 |    |     |    | 93         | 93  | 136 |     |     |     |
| 16                 | 433               | 383 | 843 |    |     |    | 155        | 95  | 102 |     |     |     |
| 20                 | 615               | 606 | 493 |    |     |    | 79         | 74  | 78  |     |     |     |
| 21                 | 491               | 318 | 368 |    |     |    | 78         | 162 | 168 |     |     |     |
| 26                 | 336               | 429 | 379 |    |     |    | 86         | 127 | 97  |     |     |     |
| 27                 | 745               | 601 | 503 |    |     |    | 146        | 118 | 141 |     |     |     |
| 28                 | 504               | 312 | 549 |    |     |    | 89         | 100 | 122 |     |     |     |

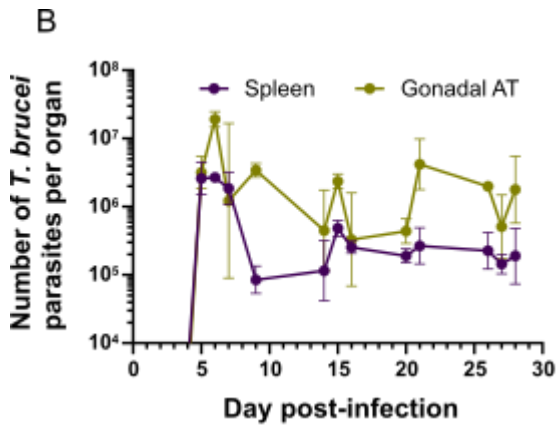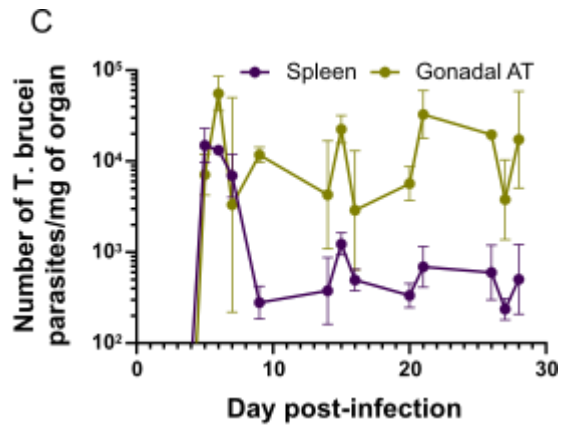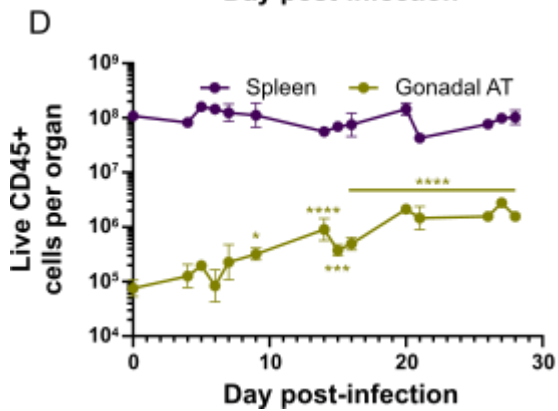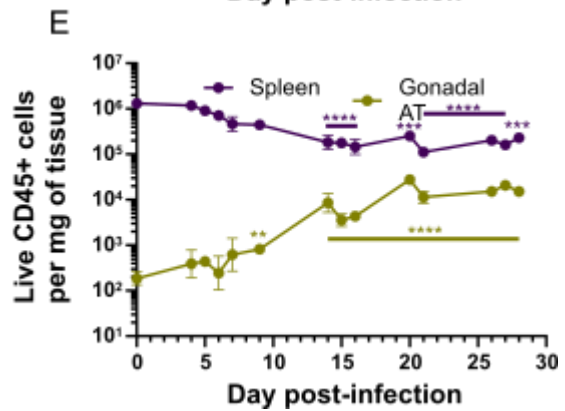

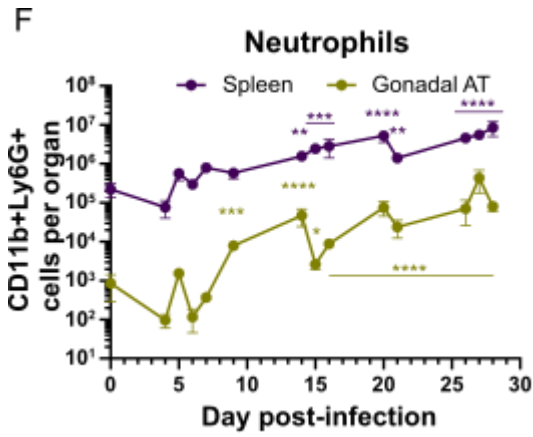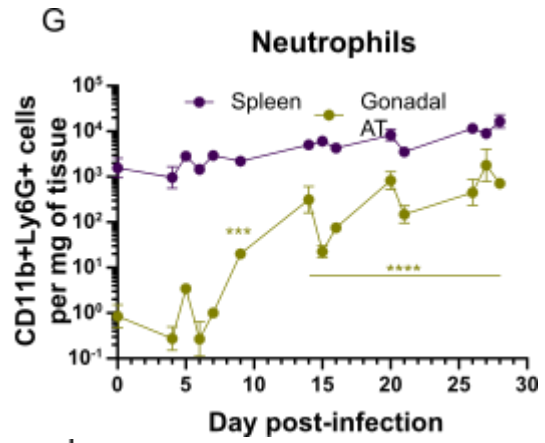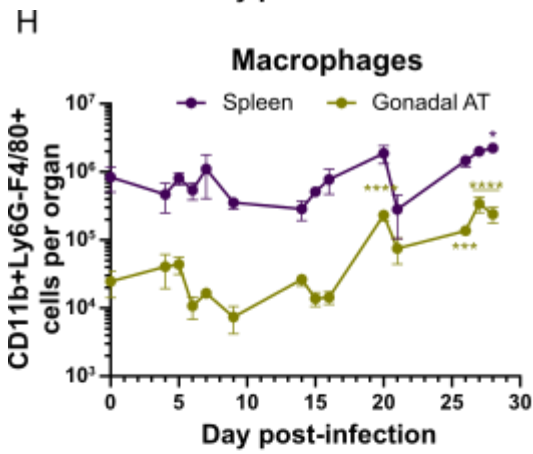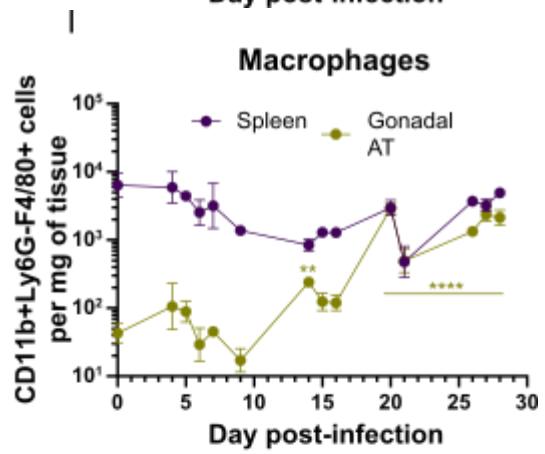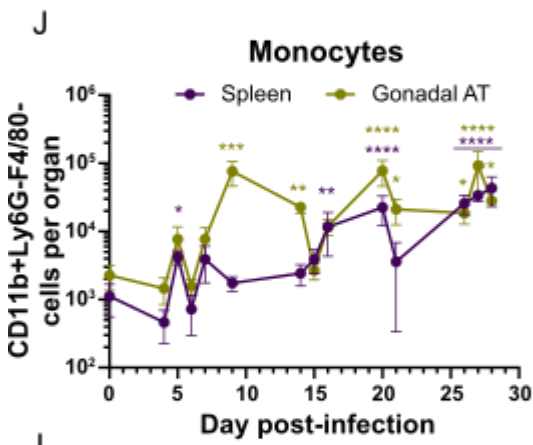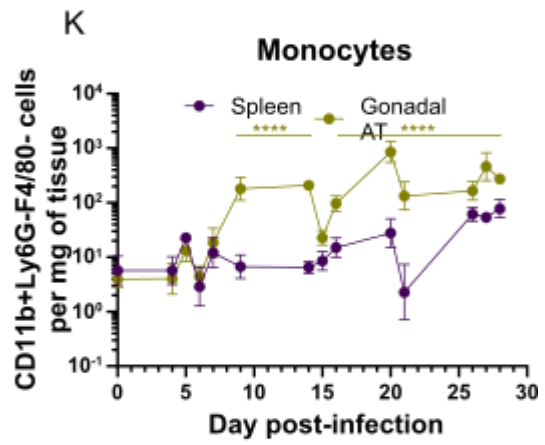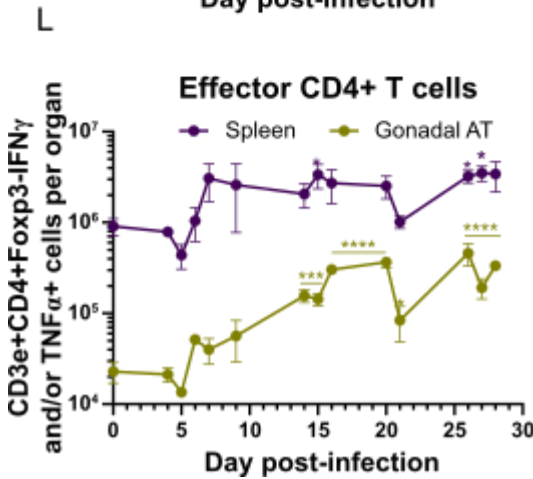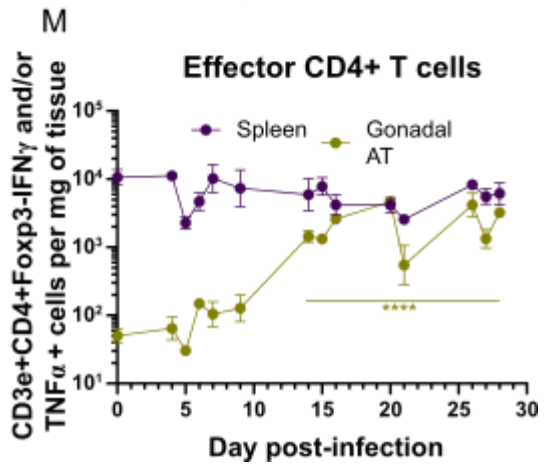

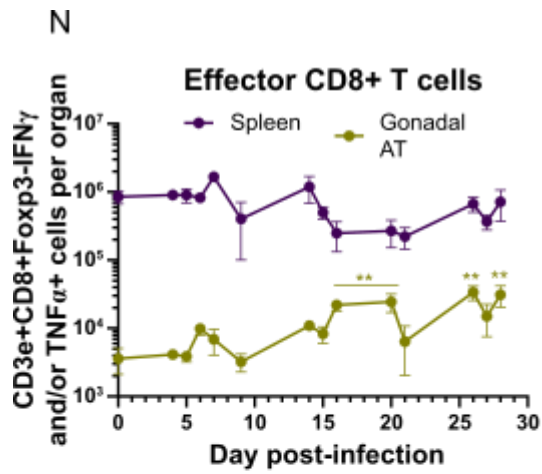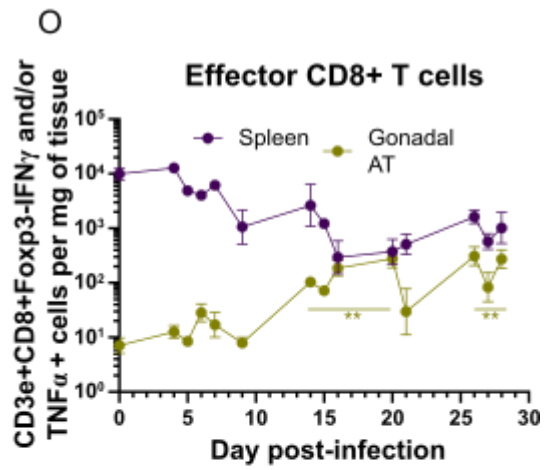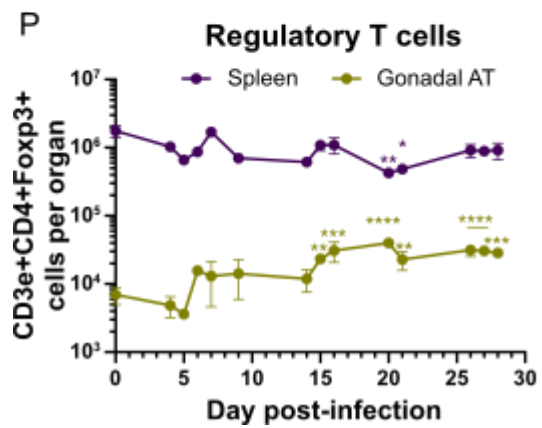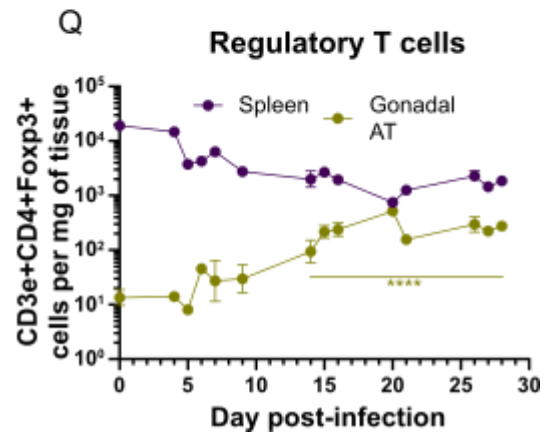

Supplement: ppat.1009933.s010.pdf [file ppat.1009933.s010.pdf]
