# Supplementary material for: Trypanosoma brucei triggers a broad immune response in the adipose tissue
Source: PubMed Central journal article supplement (PMC8476018; doi:10.1371/journal.ppat.1009933), 2021-09-15

A

| <b>(Rag2<sup>-/-</sup>) Tissue Weight (mg)</b> |        |     |     |     |     |     |     |     |     |     |     |     |       |     |     |     |    |    |
|------------------------------------------------|--------|-----|-----|-----|-----|-----|-----|-----|-----|-----|-----|-----|-------|-----|-----|-----|----|----|
| Day post-infection                             | Spleen |     |     |     |     |     | AT  |     |     |     |     |     | Heart |     |     |     |    |    |
| 6 WT                                           | 198    | 287 | 251 | 280 |     |     | 310 | 295 | 423 | 317 |     |     | 97    | 102 | 104 | 114 |    |    |
| 6 Rag2 <sup>-/-</sup>                          | 69     | 71  | 127 | 53  |     |     | 188 | 240 | 239 | 291 |     |     | 87    | 101 | 119 | 104 |    |    |
| 9 WT                                           | 282    | 401 | 190 | 324 |     |     | 239 | 194 | 261 | 313 |     |     | 102   | 116 | 116 | 117 |    |    |
| 9 Rag2 <sup>-/-</sup>                          | 212    | 228 | 198 | 197 | 219 | 219 | 142 | 120 | 162 | 175 | 200 | 131 | 95    | 90  | 87  | 108 | 93 | 87 |

B

| <b>(Jht<sup>-/-</sup>) Tissue Weight (mg)</b> |        |     |     |     |     |     |     |     |     |     |     |     |     |     |       |     |     |     |     |     |     |
|-----------------------------------------------|--------|-----|-----|-----|-----|-----|-----|-----|-----|-----|-----|-----|-----|-----|-------|-----|-----|-----|-----|-----|-----|
| Day post-infection                            | Spleen |     |     |     |     |     |     | AT  |     |     |     |     |     |     | Heart |     |     |     |     |     |     |
| 6 WT                                          | 254    | 247 | 323 | 381 | 258 | 310 | 320 | 572 | 581 | 243 | 329 | 364 | 429 | 302 | 145   | 133 | 149 | 143 | 151 | 133 | 181 |
| 6 Jht <sup>-/-</sup>                          | 128    | 119 | 222 | 221 | 135 | 122 | 126 | 482 | 437 | 420 | 377 | 375 | 365 | 366 | 136   | 130 | 128 | 167 | 122 | 100 | 105 |
| 9 WT                                          | 450    | 325 | 110 | 413 | 363 | 337 |     | 183 | 249 | 271 | 125 | 180 | 220 | 194 | 176   | 116 | 141 | 137 | 139 | 100 | 111 |
| 9 Jht <sup>-/-</sup>                          | 164    | 179 | 208 | 171 | 225 | 195 | 213 | 317 | 341 | 365 | 227 | 135 | 232 | 199 | 131   | 107 | 119 | 125 | 195 | 91  | 98  |

C

| <b>(Ifng<sup>-/-</sup>) Tissue Weight (mg)</b> |        |     |     |     |     |     |     |     |       |     |     |     |     |
|------------------------------------------------|--------|-----|-----|-----|-----|-----|-----|-----|-------|-----|-----|-----|-----|
| Day post-infection                             | Spleen |     |     |     | AT  |     |     |     | Heart |     |     |     |     |
| 6 WT                                           |        | 301 | 255 | 301 | 239 | 318 | 329 | 314 | 408   | 124 | 99  | 127 | 116 |
| 6 Ifng <sup>-/-</sup>                          |        | 359 | 276 | 335 | 305 | 260 | 266 | 246 | 246   | 113 | 102 | 117 | 95  |
| 9 WT                                           |        |     | 438 | 400 | 422 | 246 | 292 | 270 | 271   | 109 | 109 | 111 | 103 |
| 9 Ifng <sup>-/-</sup>                          |        | 307 | 266 | 353 | 291 | 215 | 161 | 229 | 208   | 98  | 92  | 91  | 105 |

D

| <b>(C3<sup>-/-</sup>) Tissue Weight (mg)</b> |        |     |     |     |     |     |     |     |     |     |       |     |     |     |     |
|----------------------------------------------|--------|-----|-----|-----|-----|-----|-----|-----|-----|-----|-------|-----|-----|-----|-----|
| Day post-infection                           | Spleen |     |     |     |     | AT  |     |     |     |     | Heart |     |     |     |     |
| 6 WT                                         | 222    | 237 | 242 | 186 |     | 356 | 346 | 250 | 302 |     | 120   | 98  | 110 | 107 |     |
| 6 C3 <sup>-/-</sup>                          | 317    | 368 | 360 | 265 |     | 162 | 226 | 184 | 290 |     | 120   | 114 | 132 | 137 |     |
| 9 WT                                         | 237    | 405 | 373 | 337 |     | 246 | 306 | 182 | 214 |     | 101   | 124 | 104 | 110 |     |
| 9 C3 <sup>-/-</sup>                          | 457    | 354 | 502 | 306 | 441 | 188 | 348 | 236 | 196 | 314 | 115   | 112 | 117 | 109 | 110 |

E

| <b>(anti-PD-1) Organ Weights (mg) (WT shared with IFN<sup>-/-</sup> experiment)</b> |        |     |     |     |     |     |     |     |       |     |     |     |  |
|-------------------------------------------------------------------------------------|--------|-----|-----|-----|-----|-----|-----|-----|-------|-----|-----|-----|--|
| Day post-infection                                                                  | Spleen |     |     |     | AT  |     |     |     | Heart |     |     |     |  |
| 6 WT                                                                                | 301    | 255 | 301 | 239 | 318 | 329 | 314 | 408 | 124   | 99  | 127 | 116 |  |
| 6 anti-PD1                                                                          | 233    | 310 | 193 | 276 | 352 | 320 | 383 | 386 | 110   | 102 | 117 | 115 |  |
| 9 WT                                                                                |        | 438 | 400 | 422 | 246 | 292 | 270 | 271 | 109   | 109 | 111 | 103 |  |
| 9 anti-PD1                                                                          | 289    | 357 | 357 | 395 | 328 | 183 | 269 | 216 | 91    | 103 | 112 | 130 |  |

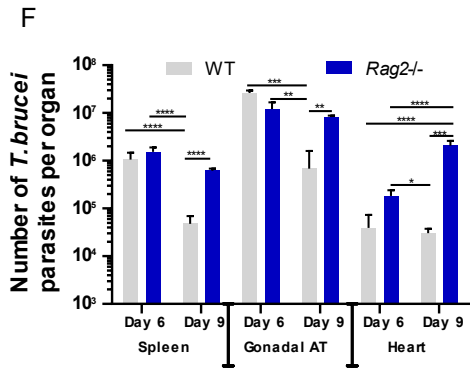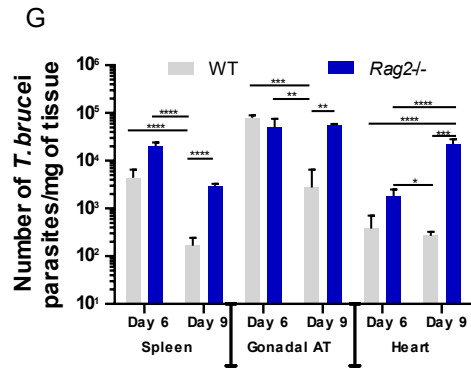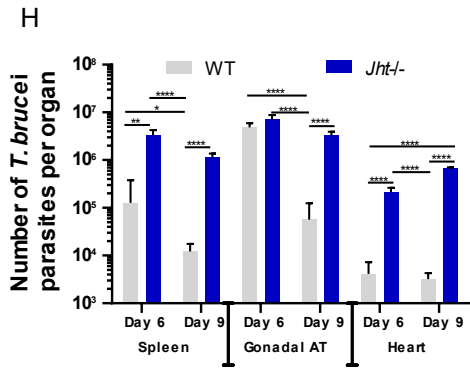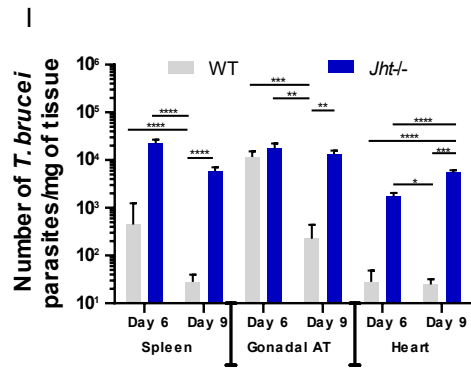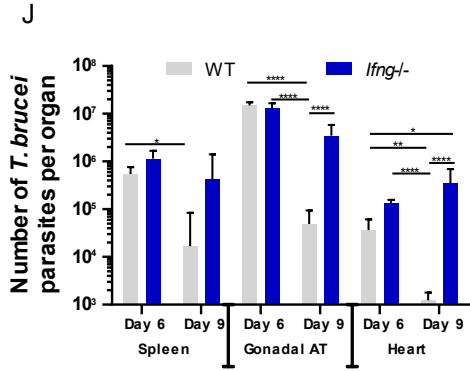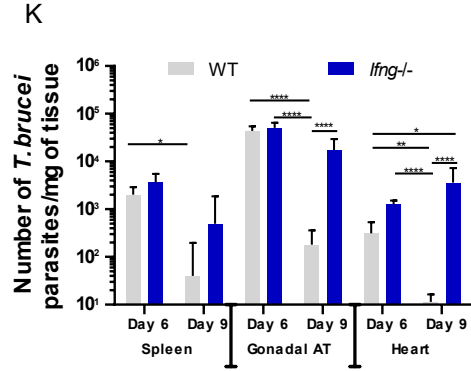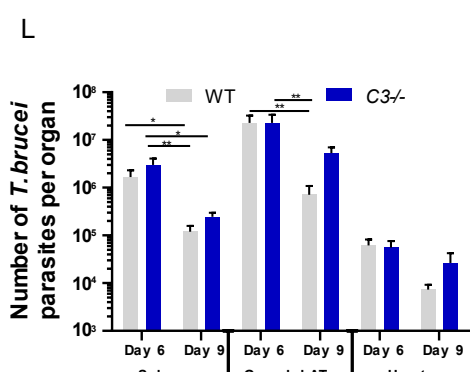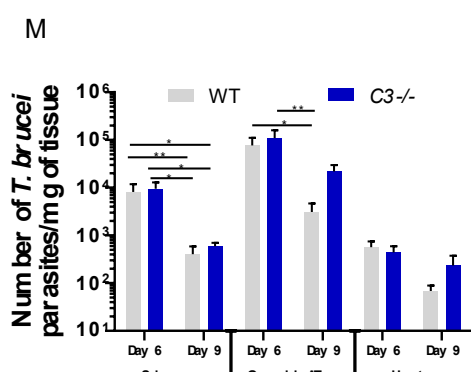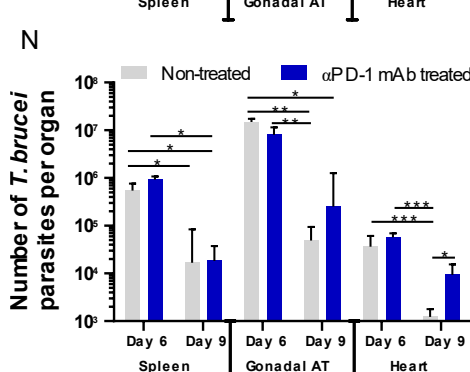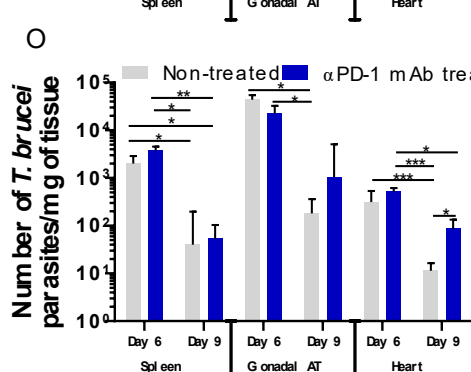

Supplement: ppat.1009933.s012.pdf [file ppat.1009933.s012.pdf]
