# Supplementary material for: Trypanosoma brucei triggers a broad immune response in the adipose tissue
Source: PubMed Central journal article supplement (PMC8476018; doi:10.1371/journal.ppat.1009933), 2021-09-15

A

| Day post-infection | Organ Weight (mg) |     |     |     |     |     |     |            |     |     |     |     |     |     |
|--------------------|-------------------|-----|-----|-----|-----|-----|-----|------------|-----|-----|-----|-----|-----|-----|
|                    | Spleen            |     |     |     |     |     |     | gonadal AT |     |     |     |     |     |     |
| 0                  | 60                | 70  | 60  | 70  |     |     |     | 354        | 366 | 400 | 426 |     |     |     |
| 6                  | 254               | 247 | 323 | 382 | 258 | 311 | 320 | 572        | 581 | 242 | 329 | 364 | 428 | 301 |
| 9                  | 450               | 325 | 110 | 413 | 425 | 362 | 336 | 183        | 250 | 271 | 125 | 180 | 220 | 194 |

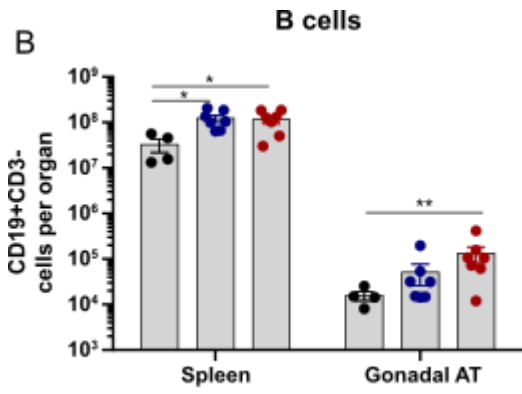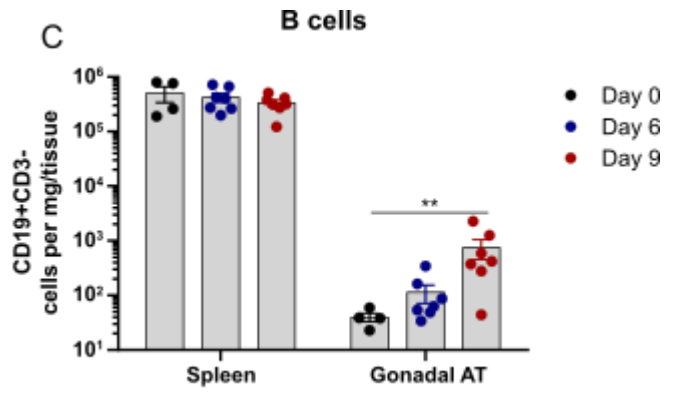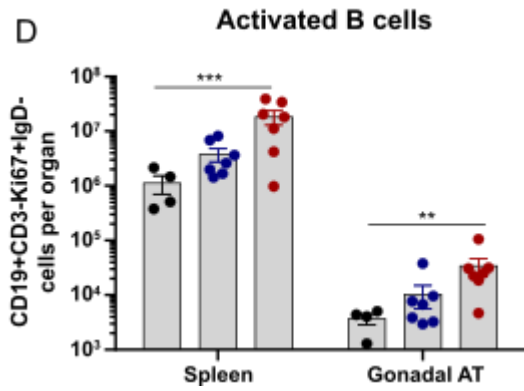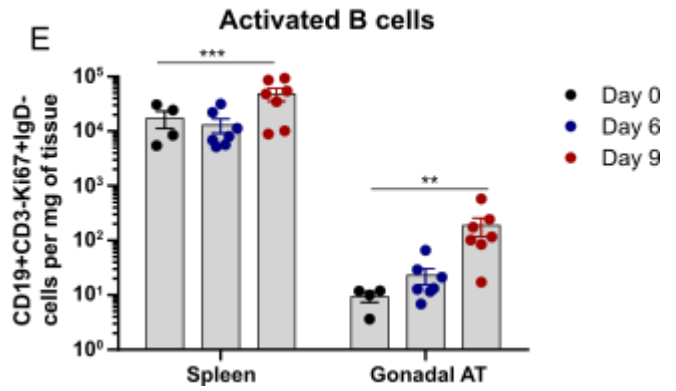

Supplement: ppat.1009933.s011.pdf [file ppat.1009933.s011.pdf]
